# Supplementary material
Source: PubMed Central journal article supplement (PMC5943828)
Supplement: 15_0408R1_Kroenke_supp_mat_101315.pdf [file 15_0408R1_Kroenke_supp_mat_101315.pdf]

**Supplementary Table 1.** Algorithms to detect SBCE\* or cancer recurrences using HMO medical record data and SEER variables, developed by Chubak† in the Group Health Cooperative HMO.

| Named in this paper | Location in Chubak et al. | Description                |                                                                                                                                                                                                                                                                                                                                                                                                                                                                                                                                                                                                           |
|---------------------|---------------------------|----------------------------|-----------------------------------------------------------------------------------------------------------------------------------------------------------------------------------------------------------------------------------------------------------------------------------------------------------------------------------------------------------------------------------------------------------------------------------------------------------------------------------------------------------------------------------------------------------------------------------------------------------|
| <b>SBCE</b>         | In main paper             |                            |                                                                                                                                                                                                                                                                                                                                                                                                                                                                                                                                                                                                           |
| <b>Algorithm 1</b>  | Figure 1                  | High sensitivity           | <ul style="list-style-type: none"> <li>- Two visits with a code for a secondary malignant neoplasm within 60 days, &gt;365 days after the primary</li> <li>-A second breast cancer record in SEER</li> <li>-Mastectomy&gt;180 days after the primary breast cancer</li> <li>-A code for a secondary non-breast malignant neoplasm &gt;180 days after the primary breast cancer</li> <li>-Two visits with a code for a secondary malignant neoplasm within 60 days, &gt;365 days after the primary</li> <li>-A second breast cancer record in SEER</li> </ul>                                              |
| <b>Algorithm 2</b>  | Figure 2                  | High specificity, PPV      | <ul style="list-style-type: none"> <li>-A non-breast cancer record in the SEER registry after the primary breast cancer</li> <li>-A mastectomy&gt;180 days after the primary</li> <li>-Surgical procedure for the primary breast cancer (SEER)—mastectomy or lumpectomy</li> <li>-A code for a secondary malignant neoplasm &gt;365 days after the primary breast cancer</li> </ul>                                                                                                                                                                                                                       |
| <b>Algorithm 3</b>  | Figure 3                  | Extremely high sensitivity | <ul style="list-style-type: none"> <li>-Breast surgery &gt;180 days after the primary</li> <li>-Maximum time between two consecutive visits for chemotherapy (<math>\leq 43</math> or <math>&gt;43</math> days)</li> <li>-A second breast cancer record in SEER</li> </ul>                                                                                                                                                                                                                                                                                                                                |
| <b>Recurrence</b>   | Supplementary             |                            |                                                                                                                                                                                                                                                                                                                                                                                                                                                                                                                                                                                                           |
| <b>Algorithm 7</b>  | Supplementary Figure 2    | High sensitivity           | <ul style="list-style-type: none"> <li>-A code for a secondary non-breast malignant neoplasm &gt;180 days after the primary breast cancer</li> <li>-A mastectomy &gt;180 days after the primary</li> <li>-Radiation therapy &gt;365 days after the primary</li> </ul>                                                                                                                                                                                                                                                                                                                                     |
| <b>Algorithm 8</b>  | Supplementary Figure 3    | High specificity           | <ul style="list-style-type: none"> <li>- Two visits with a code for a secondary malignant neoplasm within 60 days, &gt;365 days after the primary</li> <li>-A mastectomy &gt;180 days after the primary</li> <li>-Surgical procedure for the primary breast cancer (SEER registry)—mastectomy or lumpectomy</li> </ul>                                                                                                                                                                                                                                                                                    |
| <b>Algorithm 9</b>  | Supplementary Figure 4    | High specificity and PPV   | <ul style="list-style-type: none"> <li>-Two visits with a code for a secondary malignant neoplasm within 60d, &gt;365d after the primary cancer</li> <li>-A non-breast cancer record in the SEER registry after the primary breast cancer</li> <li>-A code for a secondary malignant neoplasm &gt;365 days after the primary breast cancer</li> <li>-Maximum time between 2 consecutive visits for breast surgery (<math>\leq 32</math> vs. <math>&gt;32</math> days)</li> <li>-Maximum time between 2 consecutive visits for chemotherapy (<math>\leq 94</math> vs. <math>&gt;94</math> days)</li> </ul> |
| <b>Algorithm 10</b> | Supplementary Figure 5    | Extremely high sensitivity | <ul style="list-style-type: none"> <li>-A mastectomy &gt;180 days after the primary</li> <li>-A second breast cancer record in SEER</li> <li>-Radiation therapy &gt;120 days after the primary</li> </ul>                                                                                                                                                                                                                                                                                                                                                                                                 |

\*SBCE signifies second breast cancer events. HMO is a health maintenance organization. SEER is the Surveillance, Epidemiology, and End Results Program. PPV signifies positive predictive value and NPV signifies negative predictive value. “d” denotes days.

†Chubak et al., J Natl Cancer Inst 2012. In this paper, we focused on algorithms using SEER data (i.e., Algorithms 1, 2, 3 and 7, 8, 9, and 10). Algorithms 4-6 and 11-14 do not use SEER
